# Supplementary material for: Structure and Long-Term Stability of the Microbiome in Diverse Diatom Cultures
Source: PubMed Central journal article supplement (PMC8552671; doi:10.1128/spectrum.00269-21), 2021-06-30
Supplement: reviewer-comments.pdf [file reviewer-comments.pdf]

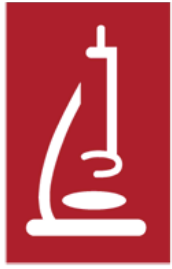

AMERICAN  
SOCIETY FOR  
MICROBIOLOGY

**Microbiology  
Spectrum**

# STRUCTURE AND LONG-TERM STABILITY OF THE MICROBIOME IN DIVERSE DIATOM CULTURES

Marcelo Barreto Filho, Melissa Walker, Matt Ashworth, and J. Jeffrey Morris

*Corresponding Author(s): J. Jeffrey Morris, University of Alabama at Birmingham*

---

## Review Timeline:

|                     |              |
|---------------------|--------------|
| Submission Date:    | May 24, 2021 |
| Editorial Decision: | May 26, 2021 |
| Revision Received:  | May 28, 2021 |
| Accepted:           | May 28, 2021 |

---

*Editor: Jeffrey Gralnick*

*Reviewer(s): The reviewers have opted to remain anonymous.*

## Transaction Report:

(Note: With the exception of the correction of typographical or spelling errors that could be a source of ambiguity, letters and reports are not edited. The original formatting of letters and referee reports may not be reflected in this compilation.)

**DOI: <https://doi.org/10.1128/Spectrum.00269-21>**

May 26, 2021

Dr. J. Jeffrey Morris  
University of Alabama at Birmingham  
Department of Biology  
Campbell Hall 253  
Birmingham, Alabama 35294-1170

Re: Spectrum00269-21 (STRUCTURE AND LONG-TERM STABILITY OF THE MICROBIOME IN DIVERSE DIATOM CULTURES)

Dear Dr. J. Jeffrey Morris:

Thank you for submitting your manuscript to Microbiology Spectrum. You and your co-authors have done a nice job thoughtfully responding to the reviewers at AEM. In consultation with another editor, it was suggested that some additional discussion be added (maybe in part 1 of the discussion that acknowledges limitations, particularly regarding absence of samples in early stages of cultivation that reviewers commented on) with some supporting refs on what is known about how phycosphere communities rapidly changes upon cultivation in the lab, for example:

<https://aem.asm.org/content/73/9/3117.short>

<https://www.nature.com/articles/s41396-020-00812-x>

I am returning your manuscript with 'minor modifications' so you can consider the above point. If you agree that this adds to the discussion, please upload a revised manuscript into the system and re-submit (you shouldn't need to change any other files). If there is a reason not to include this in the discussion, please let me know in a revised cover letter. I am looking forward to seeing this published in Spectrum.

Please use this link to submit your revised manuscript - we strongly recommend that you submit your paper within the next 60 days or reach out to me. Detailed information on submitting your revised paper are below.

Link Not Available

Thank you for the privilege of reviewing your work. Below you will find instructions from the Microbiology Spectrum editorial office and comments generated during the review.

The ASM Journals program strives for constant improvement in our submission and publication process. Please tell us how we can improve your experience by taking this quick [Author Survey](#).

Sincerely,

Jeffrey Gralnick

Editor, Microbiology Spectrum

Journals Department  
American Society for Microbiology  
1752 N St., NW  
Washington, DC 20036  
E-mail: [spectrum@asmusa.org](mailto:spectrum@asmusa.org)

Staff Comments:

### **Preparing Revision Guidelines**

To submit your modified manuscript, log onto the eJP submission site at <https://spectrum.msubmit.net/cgi-bin/main.plex>. Go to Author Tasks and click the appropriate manuscript title to begin the revision process. The information that you entered when you first submitted the paper will be displayed. Please update the information as necessary. Here are a few examples of required updates that authors must address:

- Point-by-point responses to the issues raised by the reviewers in a file named "Response to Reviewers," NOT IN YOUR COVER LETTER.
- Upload a compare copy of the manuscript (without figures) as a "Marked-Up Manuscript" file.
- Each figure must be uploaded as a separate file, and any multipanel figures must be assembled into one file.
- Manuscript: A .DOC version of the revised manuscript
- Figures: Editable, high-resolution, individual figure files are required at revision, TIFF or EPS files are preferred

For complete guidelines on revision requirements, please see the Instructions to Authors at [[link to page](#)]. **Submissions of a paper that does not conform to Microbiology Spectrum guidelines will delay acceptance of your manuscript.**

Please return the manuscript within 60 days; if you cannot complete the modification within this time period, please contact me. If you do not wish to modify the manuscript and prefer to submit it to another journal, please notify me of your decision immediately so that the manuscript may be formally withdrawn from consideration by Microbiology Spectrum.

If you would like to submit an image for consideration as the Featured Image for an issue, please contact Spectrum staff.

If your manuscript is accepted for publication, you will be contacted separately about payment when the proofs are issued; please follow the instructions in that e-mail. Arrangements for payment must be made before your article is published. For a complete list of **Publication Fees**, including supplemental material costs, please visit our [website](#).

Corresponding authors may [join or renew ASM membership](#) to obtain discounts on publication fees. Need to upgrade your membership level? Please contact Customer Service at [Service@asmusa.org](mailto:Service@asmusa.org).

Thank you for submitting your paper to Microbiology Spectrum.

May 28, 2021

Dr. J. Jeffrey Morris  
University of Alabama at Birmingham  
Department of Biology  
Campbell Hall 253  
Birmingham, Alabama 35294-1170

Re: Spectrum00269-21R1 (STRUCTURE AND LONG-TERM STABILITY OF THE MICROBIOME IN DIVERSE DIATOM CULTURES)

Dear Dr. J. Jeffrey Morris:

Your manuscript has been accepted, and I am forwarding it to the ASM Journals Department for publication. You will be notified when your proofs are ready to be viewed.

The ASM Journals program strives for constant improvement in our submission and publication process. Please tell us how we can improve your experience by taking this quick [Author Survey](#).

As an open-access publication, Spectrum receives no financial support from paid subscriptions and depends on authors' prompt payment of publication fees as soon as their articles are accepted. You will be contacted separately about payment when the proofs are issued; please follow the instructions in that e-mail. Arrangements for payment must be made before your article is published. For a complete list of **Publication Fees**, including supplemental material costs, please visit our [website](#).

Corresponding authors may [join or renew ASM membership](#) to obtain discounts on publication fees. Need to upgrade your membership level? Please contact Customer Service at [Service@asmusa.org](mailto:Service@asmusa.org).

Thank you for submitting your paper to Spectrum.

Sincerely,

Jeffrey Gralnick  
Editor, Microbiology Spectrum

Journals Department  
American Society for Microbiology  
1752 N St., NW  
Washington, DC 20036  
E-mail: [spectrum@asmusa.org](mailto:spectrum@asmusa.org)

Supplemental Material: Accept

Supplemental Figure S6: Accept  
Supplemental Table S6: Accept  
Supplemental Table S1: Accept
