# Supplementary material for: Structure and Long-Term Stability of the Microbiome in Diverse Diatom Cultures
Source: PubMed Central journal article supplement (PMC8552671; doi:10.1128/spectrum.00269-21), 2021-06-30
Supplement: spectrum00269-21_supp_1_seq8.pdf [file spectrum00269-21_supp_1_seq8.pdf]

**Supplemental Table S1. Detailed collection site data.** Spreadsheet file  
MorrisAshworth.TableS1.csv

**Table S2. Most abundant OTU in each sample.** \* indicates the genus was identified as the best match in a blastn search. # samples indicates the total number of samples in which the OTU was detected.

| Sample | OTU   | Phylum/Class          | Genus               | Abundance | Overall Abundance | # Samples |
|--------|-------|-----------------------|---------------------|-----------|-------------------|-----------|
| 1.1    | OTU2  | Alphaproteobacteria   | Unclassified        | 48.20%    | 7.20%             | 5         |
| 1.2    | OTU2  | Alphaproteobacteria   | Unclassified        | 37.70%    | 7.20%             | 5         |
| 1.3    | OTU2  | Alphaproteobacteria   | Unclassified        | 22.00%    | 7.20%             | 5         |
| 1.4    | OTU44 | Bacteroidetes         | Unclassified        | 13.70%    | 1.06%             | 5         |
| 2.1    | OTU1  | Alphaproteobacteria   | <i>Hyphomonas</i>   | 36.90%    | 8.62%             | 14        |
| 2.2    | OTU4  | Alphaproteobacteria   | <i>Oceanicola</i>   | 59.40%    | 4.47%             | 13        |
| 3.1    | OTU34 | Bacteroidetes         | <i>Ekhidna</i>      | 52.40%    | 3.83%             | 14        |
| 3.2    | OTU17 | Planctomycetes        | <i>Phycisphaera</i> | 22.80%    | 1.52%             | 1         |
| 4      | OTU3  | Alphaproteobacteria   | Sphingomonadales    | 50.30%    | 3.65%             | 8         |
| 5      | OTU7  | Bacteria unclassified | <i>Leptospira</i> * | 19.40%    | 2.21%             | 2         |
| 6      | OTU13 | Gammaproteobacteria   | <i>Alcanivorax</i>  | 18.60%    | 1.55%             | 5         |
| 7      | OTU11 | Alphaproteobacteria   | Unclassified        | 14.70%    | 1.86%             | 6         |
| 8      | OTU1  | Alphaproteobacteria   | <i>Hyphomonas</i>   | 51.50%    | 8.62%             | 14        |
| 9      | OTU12 | Gammaproteobacteria   | Unclassified        | 33.60%    | 2.63%             | 4         |
| 10     | OTU5  | Gammaproteobacteria   | Unclassified        | 26.60%    | 4.01%             | 4         |

**Table S3. OTUs shared amongst cultures from different sites.**

|              | Gab Gab 2008 | Gab Gab 2011 | Achang | Agat |
|--------------|--------------|--------------|--------|------|
| Gab Gab 2008 | 26           | 14           | 12     | 8    |
| Gab Gab 2011 |              | 73           | 14     | 10   |
| Achang       |              |              | 29     | 10   |
| Agat         |              |              |        | 22   |

**Table S4. OTUs shared amongst cultures of different species.**

|           | Astrosyne | Roundia | Florella |
|-----------|-----------|---------|----------|
| Astrosyne | 9         | 6       | 4        |
| Roundia   |           | 29      | 10       |
| Florella  |           |         | 22       |

**Table S5. P-values from AMOVA tests.**

| Grouping <sup>1</sup>         | Theta-YC          | Bray-Curtis | Jaccard Traditional | Jaccard Abundance |
|-------------------------------|-------------------|-------------|---------------------|-------------------|
| Sample Locale <sup>2</sup>    | n.s. <sup>7</sup> | n.s.        | 0.077               | n.s.              |
| Sample Site/Time <sup>3</sup> | 0.001             | 0.001       | 0.001               | 0.008             |
| Diatom Order <sup>4</sup>     | 0.074             | 0.058       | 0.075               | n.s.              |
| Diatom Species <sup>5</sup>   | n.s.              | n.s.        | 0.021               | n.s.              |
| Diatom Culture <sup>6</sup>   | 0.014             | 0.014       | 0.005               | 0.032             |

<sup>1</sup> Each AMOVA analysis was performed using four different distance metrics on a subset of the full dataset such that groupings with at least two observations per group were compared.

<sup>2</sup> Sample Locale grouping compared cultures initially obtained from Guam vs. the Gulf of Mexico.

<sup>3</sup> Sample Site/Time grouping compared cultures collected at the same site and time to culture collected at different sites and times. The groups considered were Gab Gab 2008, Gab Gab 2011, Achang, and Agat.

<sup>4</sup> Samples from cultures of diatoms from the same taxonomic order were compared: Cyclophorales vs. Striatellales.

<sup>5</sup> Samples from cultures of diatoms of the same species were compared: *Astrosyne radiata*, *Roundia cardiophora*, and *Florella pascuensis*

<sup>6</sup> Multiple samples from the same culture (Table 1) were compared: Culture 1, Culture 2, and Culture 3.

**Table S6. AMOVA Results.** Spreadsheet file MorrisAshworth.TableS6.csv**Table S7. P-values of post-hoc pairwise comparisons from significant AMOVA tests.**

| Pairwise Comparison         | Theta-YC | Bray-Curtis | Jaccard Traditional | Jaccard Abundance | Average |
|-----------------------------|----------|-------------|---------------------|-------------------|---------|
| <b>Sample Site/Time:</b>    |          |             |                     |                   |         |
| Achang – Agat               | 0.677    | 0.333       | 0.355               | 1.000             | 0.591   |
| Achang – Gab Gab 2008       | 0.067    | 0.108       | 0.080               | 0.055             | 0.078   |
| Achang – Gab Gab 2011       | 0.341    | 0.333       | 0.341               | 0.341             | 0.339   |
| Agat – Gab Gab 2008         | 0.135    | 0.067       | 0.069               | 0.182             | 0.113   |
| Agat – Gab Gab 2011         | 0.353    | 0.333       | 0.353               | 0.665             | 0.426   |
| Gab Gab 2008 – Gab Gab 2011 | 0.075    | 0.041       | 0.075               | 0.044             | 0.059   |
| <b>Diatom Culture:</b>      |          |             |                     |                   |         |
| Culture 1 – Culture 2       | 0.050    | 0.108       | 0.067               | 0.044             | 0.067   |
| Culture 1 – Culture 3       | 0.133    | 0.067       | 0.066               | 0.178             | 0.111   |
| Culture 2 – Culture 3       | 0.666    | 0.333       | 0.333               | 1.000             | 0.583   |

**Table S8. OTUs with significantly different abundances in cultures collected from Gab Gab Beach in 2008 vs. 2011.** Abundances are counts per thousand and represent means from all observed samples of cultures from the two sites. \*, OTU is present in more than half of all examined cultures. P-values were determined from Metastats analysis. Only hits from the first 100 OTUs are shown.

| OTU    | Taxonomy                         | 2008  | 2011  | p-value |
|--------|----------------------------------|-------|-------|---------|
| OTU2   | Alphaproteobacteria unclassified | 269.8 | 0.09  | 0.021   |
| OTU11  | Alphaproteobacteria unclassified | 1.4   | 131.7 | 0.005   |
| OTU18* | Rhodobacteraceae unclassified    | 26.3  | 0     | 0.032   |
| OTU19* | Gammaproteobacteria unclassified | 11.2  | 0     | 0.042   |
| OTU22  | Rhodobacteraceae unclassified    | 0.91  | 0     | 0.042   |
| OTU56  | Bacteroidetes unclassified       | 0     | 21.2  | 0.013   |
| OTU57  | <i>Balneola</i>                  | 9.8   | 0.91  | 0.032   |
| OTU70  | Saprospiraceae unclassified      | 0     | 14.1  | 0.005   |
| OTU86  | Alphaproteobacteria unclassified | 0.63  | 0     | 0.017   |

**Table S9. OTUs with significantly different abundances in cultures collected from Gab Gab Beach in 2008 vs. Achang Reef.** Abundances are counts per thousand and represent means from all observed samples of cultures from the two sites. P-values were determined from Metastats analysis. Only hits from the first 100 OTUs are shown.

| OTU   | Taxonomy                         | Achang | Gab Gab 2008 | p-value |
|-------|----------------------------------|--------|--------------|---------|
| OTU2  | Alphaproteobacteria unclassified | 0      | 269.8        | 0.027   |
| OTU57 | <i>Balneola</i>                  | 0      | 9.8          | 0.039   |
| OTU86 | Alphaproteobacteria unclassified | 8.1    | 0.63         | 0.020   |

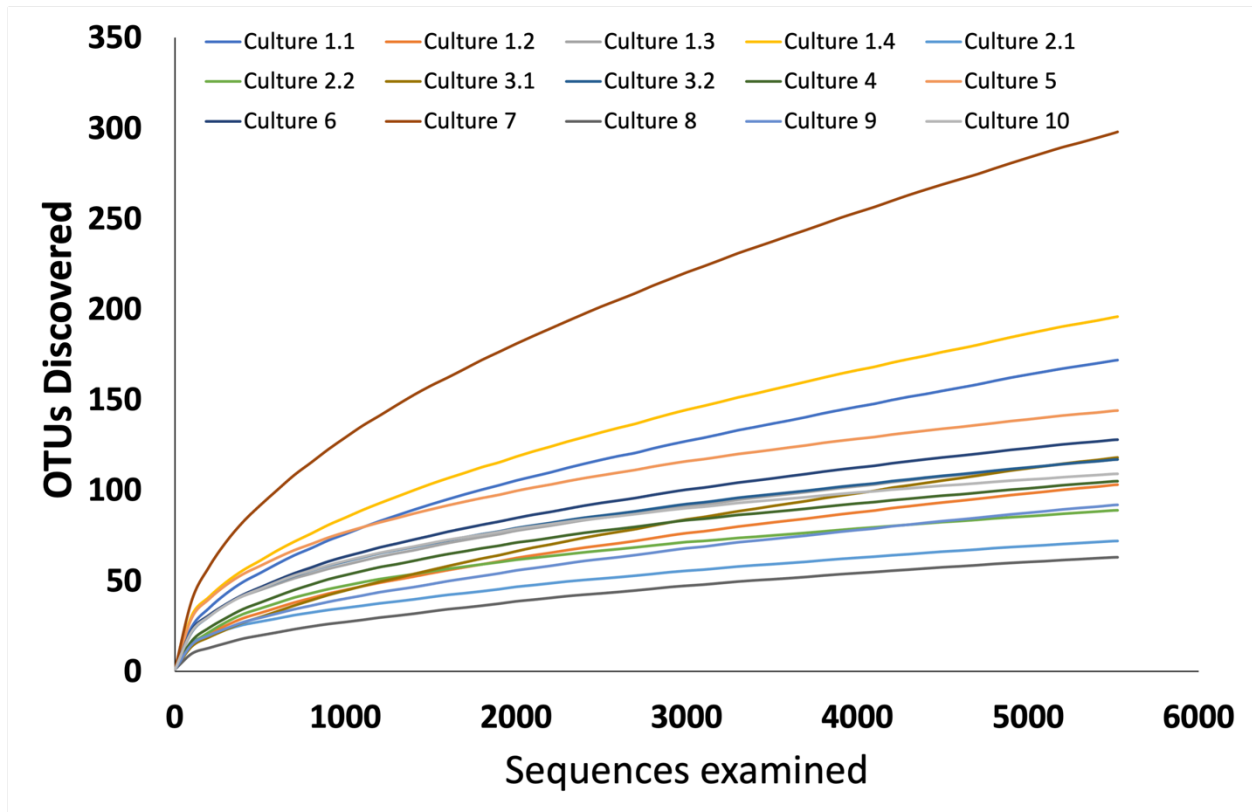

**Figure S1. Rarefaction analysis of sequencing.** Culture designations correspond to the names given in Table S1.

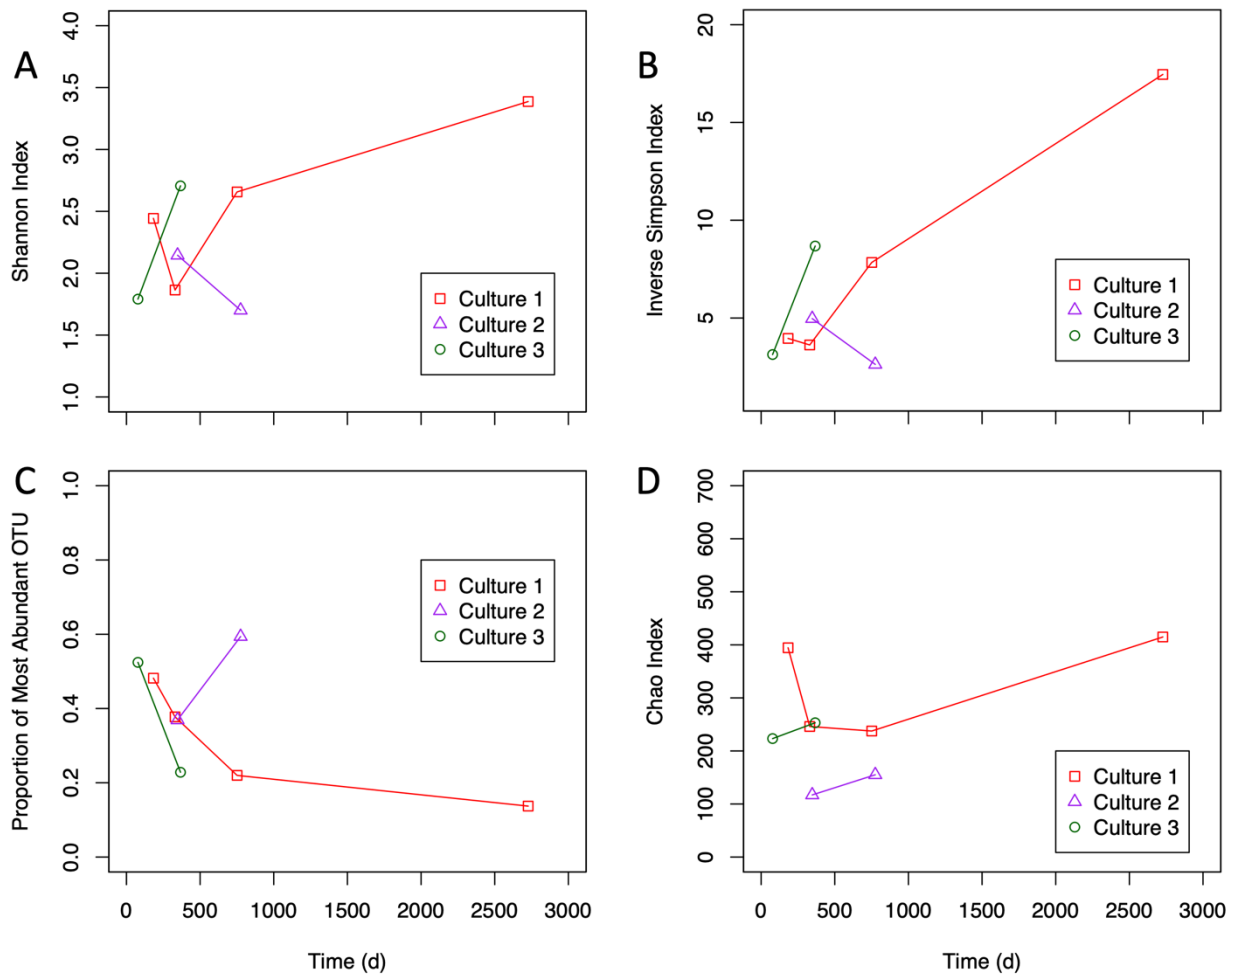

**Figure S2. Changes in culture diversity metrics over time in multiply sampled cultures.** Each line connects successive time-point samples from the same diatom culture. Culture 1, *Astrosyne radiata*; Culture 2, *Roundia cardiophora*; Culture 3, *Florella pascuensis*.

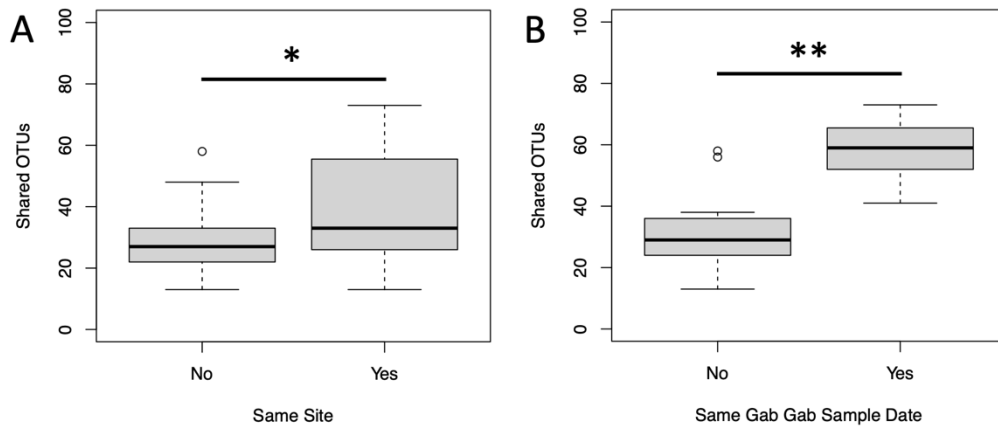

**Figure S3. Shared OTUs by Site and Sampling Time.** A. Significantly more OTUs were shared between samples of cultures collected at the same site than different sites. B. For samples collected at the same site, repeated samplings of cultures initially collected on the same day had more shared OTUs with each other than with samplings from other dates. Asterisks represent the result of Mann-Whitney U tests comparing the two groups shown; \*,  $p < 0.05$ ; \*\*,  $p < 0.01$ .

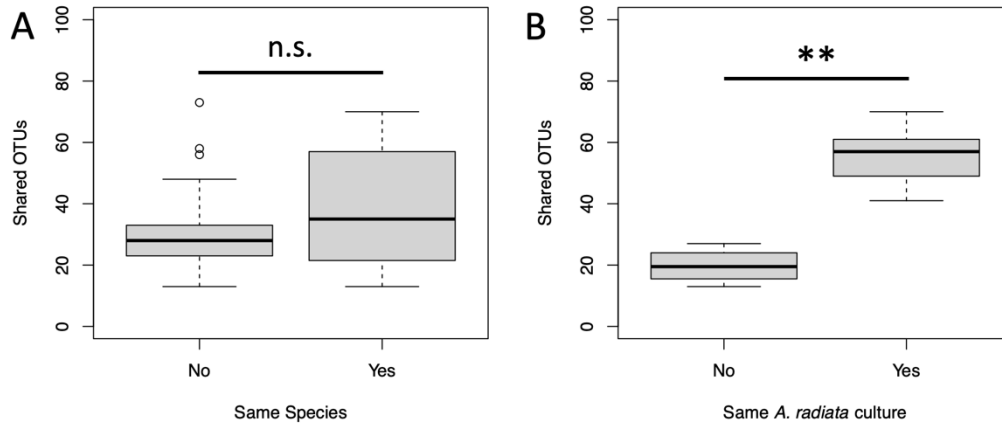

**Figure S4. Shared OTUs by Species.** A. The number of shared OTUs between cultures of the same diatom species was not statistically greater than the number of shared OTUs between cultures of different diatoms. B. Repeated samples from one *Astrosyne radiata* culture shared more OTUs with each other than any of them did with an *A. radiata* culture collected at the same site but at a different time. Asterisks represent the result of Mann-Whitney U tests comparing the two groups shown; n.s., not significant ( $p > 0.05$ ); \*\*,  $p < 0.01$ .

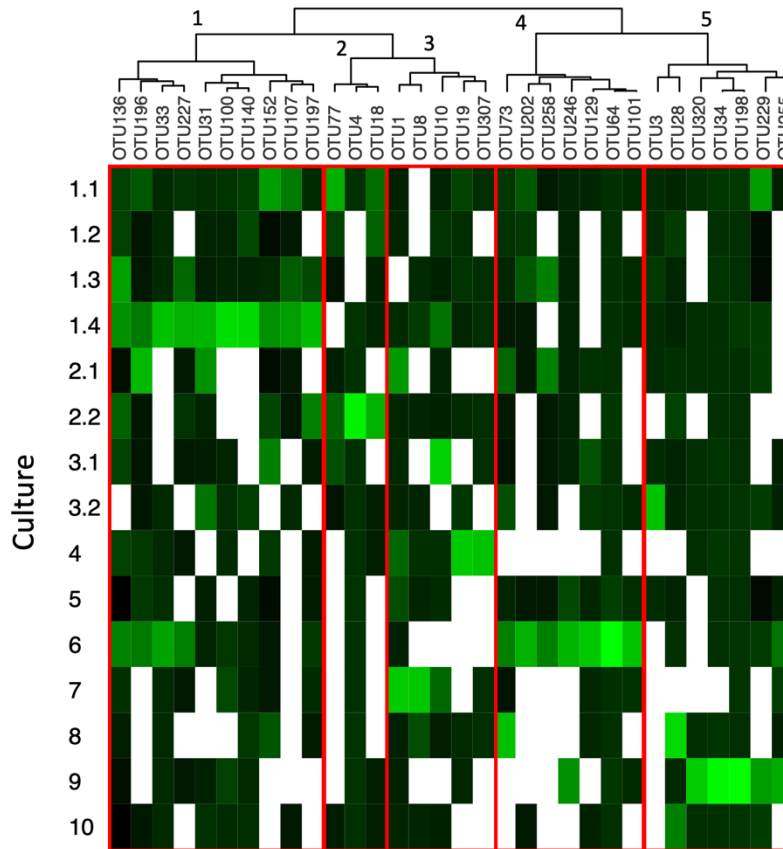

**Figure S5. Abundance of ubiquitous OTUs across samples.** White boxes indicate the OTU was not detected in the sample. Colors ranging from black (low) to green (high) indicate relative abundance in each sample, scaled for each OTU to a mean of 0 and a standard deviation of 1. Dendrogram and node numbering are derived from the hierarchical clustering algorithm described in main text Figure 3; red boxes enclose the five clusters.



**Figure S6. Diatom microbiome community structure.** This animated NMDS plot shows how the various cultures cluster together in three dimensional space. Arrows connecting spheres show multiply sampled cultures, going from earlier to later samples. The light-gray arrows are vectors representing the influence the most impactful OTUs on community position in the plot; the size of the arrow and arrowhead scale with the ubiquity of the OTU. Only OTU1 was found in >50% of samples. (Note: movie file available as separate download)
